# Supplementary material for: Expression profiling of clonal lymphocyte cell cultures from Rett syndrome patients
Source: PubMed Central journal article supplement (PMC1569822; doi:10.1186/1471-2350-7-61), 2006-07-21
Supplement: 1471-2350-7-61-S2.pdf [file 1471-2350-7-61-S2.pdf]

**SUPPLEMENTARY TABLE 2: COMPARISON OF GENE LISTS FROM DIFFERENT MICROARRAY EXPERIMENTS**

Legend: gene symbols in parentheses indicate opposite regulation between the overlapping experiments.

|                          | <b>GCRMA lymphocytes</b> | <b>Traynor</b>         | <b>Tudor</b> | <b>Colantuoni</b>     | <b>Horike</b> | <b>Ballestar</b> | <b>Embryoid bodies</b> |
|--------------------------|--------------------------|------------------------|--------------|-----------------------|---------------|------------------|------------------------|
| <b>GCRMA lymphocytes</b> |                          | BEXL1 (SVIL)           | none         | (YWHAB)               | none          | none             | LPIN, SPOCK1           |
| <b>Traynor</b>           | BEXL1 (SVIL)             |                        | none         | none                  | none          | none             | CALD1, TCF21, C22orf16 |
| <b>Tudor</b>             | none                     | none                   |              | PVALB                 | none          | none             | none                   |
| <b>Colantuoni</b>        | (YWHAB)                  | none                   | PVALB        |                       | none          | none             | CRYAB, C5orf13, CDC42  |
| <b>Horike</b>            | none                     | none                   | none         | none                  |               | none             | none                   |
| <b>Ballestar</b>         | none                     | none                   | none         | none                  | none          |                  | none                   |
| <b>Embryoid bodies</b>   | LPIN, SPOCK1             | CALD1, TCF21, C22orf16 | none         | CRYAB, C5orf13, CDC42 | none          | none             |                        |
